# Supplementary material
Source: Springer Nature journal article supplement (https://www.springermedizin.de/resource/supplementary/12889_2013_5968_MOESM2_ESM.pdf/9493992)
Supplement: MOESM2 [file 9493992]

| Glucose state at first examination | Glucose state at follow-up |                |               |             |               | Total            |
|------------------------------------|----------------------------|----------------|---------------|-------------|---------------|------------------|
|                                    | NGT                        | IFG            | IGT           | IFG & IGT   | T2D           |                  |
| <b>NGT</b>                         | 20 542<br>(78%)            | 3 271<br>(12%) | 1 138<br>(4%) | 599<br>(2%) | 816<br>(3%)   | 26 366<br>(100%) |
| <b>IFG</b>                         | 1 017<br>(51%)             | 499<br>(25%)   | 87<br>(4%)    | 123<br>(6%) | 282<br>(14%)  | 2 008<br>(100%)  |
| <b>IGT</b>                         | 394<br>(48%)               | 74<br>(9%)     | 148<br>(18%)  | 65<br>(8%)  | 141<br>(17%)  | 822<br>(100%)    |
| <b>IFG &amp; IGT</b>               | 36<br>(18%)                | 24<br>(12%)    | 17<br>(8%)    | 27<br>(13%) | 98<br>(49%)   | 202<br>(100%)    |
| <b>T2D</b>                         | 113<br>(21%)               | 56<br>(10%)    | 15<br>(3%)    | 25<br>(5%)  | 330<br>(61%)  | 539<br>(100%)    |
| <b>Total</b>                       | 22 102<br>(74%)            | 3 924<br>(13%) | 1 405<br>(5%) | 839<br>(3%) | 1 667<br>(6%) | 29 937<br>(100%) |

<sup>a</sup> Follow-up was 10 years after first examination
